# Supplementary material
Source: PubMed Central journal article supplement (PMC4213949)
Supplement: NIHMS563938-supplement-01.pdf [file NIHMS563938-supplement-01.pdf]

Figure S1. Group mean functional connectivity maps for DA, DM, SAL and CON for children with ADHD. Black circles indicate the location of seed regions used to generate each map. Images are displayed using a threshold of an absolute value of  $r > 0.1$ .

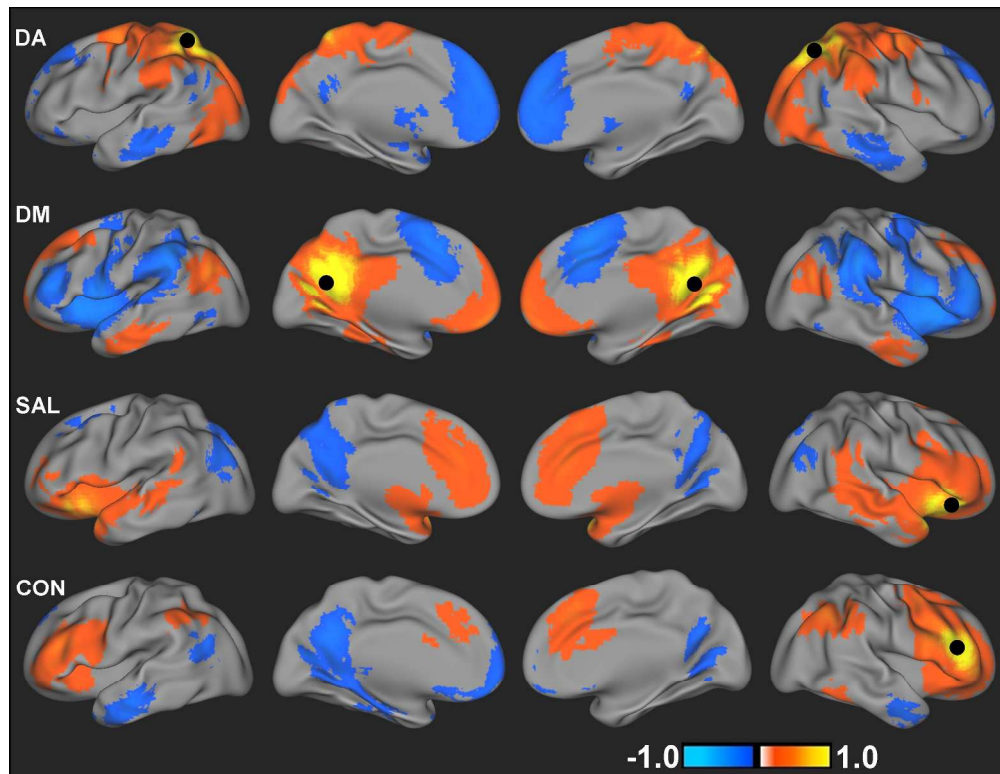

Group mean functional connectivity maps for DA, DM, SAL and CON for children with ADHD. Black circles indicate the location of seed regions used to generate each map. Images are displayed using a threshold of an absolute value of  $r > 0.1$ .  
249x192mm (300 x 300 DPI)

**Supplemental Table I.** Resting-state fMRI scan parameters by site.

|                               | <b>KKI</b> | <b>NYU</b>  | <b>PU</b>   |
|-------------------------------|------------|-------------|-------------|
| Scan Duration                 | 6:40       | 6:00        | 8:00        |
| TR (ms)                       | 2500       | 2000        | 2000        |
| TE (ms)                       | 30         | 15          | 30          |
| Flip Angle (°)                | 75         | 90          | 90          |
| Voxel Size (mm <sup>3</sup> ) | 3x3x3      | 3x3x4       | 3.1x3.1x3.5 |
| Slices                        | 47         | 33          | 33          |
| FOV (mm <sup>2</sup> )        | 256x256    | 240x192     | 200x200     |
| Acquisition Sequence          | ascending  | interleaved | interleaved |

TR, repetition time; TE, echo time; FOV, field of view; mm, millimeters; ADHD, attention-deficit/hyperactivity disorder; KKI, Kennedy Krieger Institute; NYU, New York University; PU, Peking University.

**Supplemental Table II.** Regional connectivity alterations associated with inattentive symptoms

| DA                                      | BA     | x   | y   | z   | # voxels | direction |
|-----------------------------------------|--------|-----|-----|-----|----------|-----------|
| L superior parietal lobule              | 7      | -24 | -70 | 45  | 187      | positive  |
| DM                                      | BA     | x   | y   | z   | # voxels | direction |
| precuneus                               | 7      | 0   | -70 | 36  | 447      | positive  |
| R fusiform gyrus                        | 37     | 46  | -48 | -17 | 561      | negative  |
| L fusiform gyrus                        | 37     | -35 | -54 | -21 | 293      | negative  |
| SAL                                     | BA     | x   | y   | z   | # voxels | direction |
| L fusiform gyrus, parahippocampal gyrus | 36, 37 | -35 | -49 | -11 | 411      | positive  |
| R fusiform gyrus, parahippocampal gyrus | 36, 38 | 27  | -31 | -15 | 181      | positive  |
| CON                                     | BA     | x   | y   | z   | # voxels | direction |
| paracentral lobule, precuneus           | 5, 7   | -3  | -51 | 49  | 798      | positive  |
| L, R cerebellum                         |        | 2   | -40 | -44 | 178      | positive  |
| L precentral gyrus                      | 6      | -50 | -2  | 25  | 538      | negative  |
| L, R cerebellum                         |        | -5  | -70 | -45 | 518      | negative  |
| L, R anterior cingulate cortex          | 32     | 8   | 20  | 36  | 454      | negative  |
| R precentral gyrus                      | 6      | 54  | -3  | 28  | 407      | negative  |
| L caudate, lentiform nucleus, putamen   |        | -16 | 2   | 9   | 279      | negative  |
| R middle/superior frontal gyrus         | 9      | 29  | 45  | 30  | 271      | negative  |
| L middle frontal gyrus                  | 9      | -34 | 45  | 28  | 194      | negative  |
| R lentiform nucleus, putamen            |        | 22  | 8   | 4   | 156      | negative  |

Coordinates reported in Montreal Neurological Institute (MNI) standard space.

L, left; R, right; BA, Brodmann Area; DA, dorsal attention network; DM, default mode network; SAL, salience processing network; CON, executive control network; ADHD, attention-deficit/hyperactivity disorder; TDC, typically-developing children.

**Supplemental Table III.** Regional connectivity alterations associated with hyperactive/impulsive symptoms

| DA                                                  | BA     | x   | y   | z   | # voxels | direction |
|-----------------------------------------------------|--------|-----|-----|-----|----------|-----------|
| R middle frontal gyrus, precentral gyrus            | 6      | 44  | 1   | 49  | 234      | positive  |
| L anterior cingulate cortex, superior frontal gyrus | 32     | -21 | 38  | 3   | 740      | negative  |
| L precuneus, posterior cingulate cortex             | 31     | -17 | -60 | 23  | 287      | negative  |
| R precuneus, posterior cingulate cortex             | 31     | 16  | 56  | 27  | 174      | negative  |
| DM                                                  | BA     | x   | y   | z   | # voxels | direction |
| R middle/superior frontal gyrus                     | 10     | 33  | 47  | 14  | 650      | positive  |
| R insula                                            | 13     | 38  | 9   | 2   |          |           |
| R middle temporal gyrus                             | 19     | 35  | -76 | 20  | 199      | positive  |
| L fusiform gyrus                                    | 20     | -43 | -26 | -17 | 1095     | negative  |
| L middle temporal gyrus                             | 21     | -60 | -37 | -5  |          |           |
| R insula                                            | 13     | 38  | 7   | 7   |          |           |
| R middle occipital gyrus                            | 19     | 39  | -76 | -10 | 254      | negative  |
| medial frontal gyrus                                | 25     | 3   | 26  | -22 | 231      | negative  |
| R parahippocampal gyrus                             | 36     | 31  | -31 | -22 | 176      | negative  |
| SAL                                                 | BA     | x   | y   | z   | # voxels | direction |
| R parahippocampal gyrus                             | 35     | 25  | -23 | -13 | 351      | positive  |
| R precentral gyrus                                  | 6      | 28  | -20 | 57  | 381      | negative  |
| R insula/superior temporal gyrus                    | 13, 41 | 50  | -26 | 17  | 212      | negative  |
| CON                                                 | BA     | x   | y   | z   | # voxels | direction |
| medial frontal gyrus                                | 10     | 1   | 39  | -4  | 1226     | positive  |
| L precentral gyrus                                  | 6      | -44 | -6  | 51  | 339      | positive  |
| R inferior temporal gyrus                           | 21     | 60  | -9  | -17 | 250      | positive  |
| L inferior/middle temporal gyrus                    | 21     | -56 | -26 | -11 | 192      | positive  |
| L, R cerebellum, lingual gyrus                      | 18     | 12  | 26  | -24 | 2116     | negative  |
| L middle frontal gyrus                              | 10     | -36 | 43  | 26  | 243      | negative  |

Coordinates reported in Montreal Neurological Institute (MNI) standard space.

L, left; R, right; BA, Brodmann Area; DA, dorsal attention network; DM, default mode network; SAL, salience processing network; CON, executive control network; ADHD, attention-deficit/hyperactivity disorder; TDC, typically-developing children.

**Supplemental Table IV.** Regional connectivity alterations associated with ADHD diagnosis

| DM                                                                           | BA     | x   | y   | z   | # voxels | contrast |
|------------------------------------------------------------------------------|--------|-----|-----|-----|----------|----------|
| L postcentral gyrus, precentral gyrus                                        | 3, 4   | -48 | -11 | 50  | 321      | ADHD>TDC |
| R fusiform gyrus                                                             | 37     | 49  | -59 | -15 | 313      | ADHD>TDC |
| R middle occipital gyrus                                                     | 19     | 44  | -74 | 9   |          |          |
| paracentral lobule                                                           | 4      | -7  | -29 | 62  | 182      | ADHD>TDC |
| R postcentral gyrus                                                          | 3      | 45  | -17 | 49  | 171      | ADHD>TDC |
| R middle temporal gyrus                                                      | 20     | 56  | -40 | -6  | 164      | ADHD>TDC |
| L, R superior frontal gyrus, anterior cingulate cortex                       | 10, 32 | -5  | 45  | 12  | 1804     | TDC>ADHD |
| SAL                                                                          | BA     | x   | y   | z   | # voxels | contrast |
| L fusiform gyrus                                                             | 37     | -37 | -48 | -17 | 533      | TDC>ADHD |
| L middle frontal gyrus                                                       | 6      | -29 | -6  | 47  | 371      | TDC>ADHD |
| CON                                                                          | BA     | x   | y   | z   | # voxels | contrast |
| L, R superior frontal gyrus, medial frontal gyrus, anterior cingulate cortex | 10, 32 | -10 | 27  | 27  | 1615     | ADHD>TDC |
| R insula                                                                     | 13     | 35  | 20  | 14  |          |          |
| L insula                                                                     | 13     | -37 | 17  | 11  |          |          |
| L, R cerebellum                                                              | 10     | 0   | 38  | 47  | 1045     | ADHD>TDC |
| L paracentral lobule, postcentral gyrus                                      | 5      | -42 | 25  | 0   | 541      | TDC>ADHD |
| L precentral gyrus                                                           | 4      | -37 | -19 | 55  |          |          |
| R precuneus                                                                  | 7      | 13  | -47 | 61  | 219      | TDC>ADHD |

Coordinates reported in Montreal Neurological Institute (MNI) standard space.

L, left; R, right; BA, Brodmann Area; DA, dorsal attention network; DM, default mode network; SAL, salience processing network; CON, executive control network; ADHD, attention-deficit/hyperactivity disorder; TDC, typically-developing children.

**Supplemental Table V.** Regional connectivity alterations associated with the interaction of inattentive symptoms and ADHD diagnosis

| DA                               | BA | x   | y   | z   | # voxels | direction |
|----------------------------------|----|-----|-----|-----|----------|-----------|
| L, R cerebellum                  |    | -3  | -73 | -38 | 687      | positive  |
| L, R supplementary motor area    | 6  | 5   | -10 | 61  | 554      | positive  |
| R precentral/postcentral gyrus   | 4  | 58  | -11 | 35  | 343      | positive  |
| R thalamus                       |    | 4   | -34 | 3   | 233      | positive  |
| L, R caudate                     |    | -11 | 7   | 23  | 193      | positive  |
| L middle frontal gyrus           | 9  | -52 | 17  | 32  | 172      | positive  |
| DM                               | BA | x   | y   | z   | # voxels | direction |
| anterior cingulate cortex        | 24 | -6  | 5   | 26  | 647      | positive  |
| precuneus                        | 7  | 0   | -55 | 52  | 167      | positive  |
| R insula                         | 13 | 41  | 7   | -8  | 154      | positive  |
| SAL                              | BA | x   | y   | z   | # voxels | direction |
| R amygdala/parahippocampal gyrus |    | 18  | -1  | -15 | 1312     | positive  |
| L, R lingual gyrus               | 19 | 13  | -60 | 0   |          |           |
| L thalamus                       |    | -12 | -27 | 15  |          |           |
| R postcentral gyrus              | 3  | 20  | -38 | -67 | 175      | positive  |
| L, R caudate                     |    | -4  | 10  | -8  | 155      | negative  |
| CON                              | BA | x   | y   | z   | # voxels | direction |
| R cerebellum                     |    | 48  | -76 | -33 | 453      | positive  |
| R middle temporal gyrus          | 21 | 60  | -29 | -8  | 301      | positive  |
| R postcentral gyrus              | 3  | 30  | -16 | 30  | 300      | positive  |

Coordinates reported in Montreal Neurological Institute (MNI) standard space.

L, left; R, right; BA, Brodmann Area; DA, dorsal attention network; DM, default mode network; SAL, salience processing network; CON, executive control network; ADHD, attention-deficit/hyperactivity disorder; TDC, typically-developing children.

**Supplemental Table VI.** Regional connectivity alterations associated with the interaction of hyperactive/impulsive symptoms and ADHD diagnosis

| DA                                         | BA     | x   | y   | z   | # voxels | direction |
|--------------------------------------------|--------|-----|-----|-----|----------|-----------|
| R superior frontal gyrus/precentral gyrus  | 6      | 22  | -9  | 68  | 264      | positive  |
| R inferior/middle temporal gyrus           | 21     | 55  | -23 | -15 | 185      | positive  |
| DM                                         | BA     | x   | y   | z   | # voxels | direction |
| L inferior/middle frontal gyrus            | 45, 46 | -42 | 30  | 4   | 613      | positive  |
| L inferior parietal lobule                 | 40     | -45 | -38 | 46  | 370      | positive  |
| R inferior frontal gyrus                   | 46     | 39  | 36  | 10  | 216      | positive  |
| L putamen                                  |        | -19 | -1  | 5   | 168      | positive  |
| brain stem                                 |        | 0   | -29 | -18 | 499      | negative  |
| precuneus/cuneus                           | 7, 18  | 1   | -70 | 28  | 483      | negative  |
| L cerebellum                               |        | -30 | -78 | -36 | 278      | negative  |
| R superior temporal gyrus                  | 22     | 52  | -48 | 17  | 158      | negative  |
| SAL                                        | BA     | x   | y   | z   | # voxels | direction |
| paracentral lobule                         | 4      | 2   | -25 | 48  | 830      | positive  |
| L angular gyrus                            | 39     | -49 | -56 | 31  | 408      | positive  |
| L cerebellum                               |        | -40 | -59 | -34 | 755      | negative  |
| L inferior occipital gyrus                 | 19     | -40 | -78 | -6  |          |           |
| R cerebellum                               |        | 45  | -55 | -30 | 331      | negative  |
| R inferior temporal gyrus                  | 37     | 53  | -60 | -10 |          |           |
| CON                                        | BA     | x   | y   | z   | # voxels | direction |
| L, R precuneus, posterior cingulate cortex | 7,31   | 7   | -49 | 32  | 832      | positive  |
| R superior temporal gyrus/angular gyrus    | 39     | 46  | -56 | 29  | 496      | positive  |
| R superior frontal gyrus                   | 8      | 23  | 36  | 43  | 440      | positive  |
| L superior temporal gyrus                  | 22     | -52 | -26 | 8   | 280      | negative  |
| L inferior frontal gyrus                   | 45     | -39 | 38  | 2   | 235      | negative  |
| R superior temporal gyrus                  | 22     | 54  | 6   | -5  | 231      | negative  |
| R superior temporal gyrus                  | 41     | 57  | -25 | 8   | 168      | negative  |

Coordinates reported in Montreal Neurological Institute (MNI) standard space.

L, left; R, right; BA, Brodmann Area; DA, dorsal attention network; DM, default mode network; SAL, salience processing network; CON, executive control network; ADHD, attention-deficit/hyperactivity disorder; TDC, typically-developing children.
